# Supplementary material for: Using Three Cross-Sectional Surveys to Compare Workplace Psychosocial Stressors and Associated Mental Health Status in Six Migrant Groups Working in Australia Compared with Australian-Born Workers
Source: PubMed Central journal article supplement (PMC6427607; doi:10.3390/ijerph16050735), 2019-02-28
Supplement: ijerph-16-00735-s001.pdf [file ijerph-16-00735-s001.pdf]

Supplementary Table 1. Distribution of the migrant survey respondents by source of sample and country of birth.

| Sample source                                                                            | New     |       |             |
|------------------------------------------------------------------------------------------|---------|-------|-------------|
|                                                                                          | Zealand | India | Philippines |
| EWP stratified random - surname based                                                    | 280     | 319   | 146         |
| EWP random migrant dense suburbs - surname based which were mostly in metropolitan areas | 140     | 97    | 54          |
| Sample broker (unknown sources)                                                          | 122     | 196   | 217         |
| Other (advertising and snowballing)                                                      | 24      | 21    | 14          |
| Total sample recruited                                                                   | 566     | 633   | 431         |
